# Supplementary material
Source: publisher site journal article supplement (https://www.spandidos-publications.com/7432/downloadSupplementary)
Supplement: Supplementary file 1 [file downloadSupplementary]

## **Data S1. Supplementary methods**

*Specimen analysis.* The specimens were fixed in 4% paraformaldehyde at a volume 5 times that of the tissue for 12-24 h. For embedding, hard paraffin wax (melting point 56-58°C or 60-62°C) was used. The molten wax was poured into metal molds, and the tissue cassettes were submerged in the wax. The blocks were then placed on a cooling stage (4-6 h) until

complete solidification. Finally, 3- $\mu$ m thick sections were cut for further analysis.

Immunostaining (Table SI) was performed using the UltraView Universal DAB Kit (catalog no. 760-500; Roche Tissue Diagnostics) with HRP-conjugated multimer antibodies and DAB chromogen, according to the manufacturer's protocol. Observation was performed under a conventional bright-field microscope at x400 magnification.

Table SI. Immunohistochemistry antibodies from Roche Diagnostics.

| Indicators | Proportion of dilution | Catalog no. | Temperature of incubation, °C | Duration of incubation, min     |
|------------|------------------------|-------------|-------------------------------|---------------------------------|
| H&E        | 1:250                  | 760-2208    | Room temperature              | According to standard procedure |
| ER         | 1:250                  | 790-4325    | 37                            | 32                              |
| PR         | 1:250                  | 790-4296    | 37                            | 32                              |
| HER2       | 1:50                   | 790-4493    | 37                            | 32                              |
| GATA3      | 1:250                  | 760-500     | 37                            | 32                              |
| CK7        | Predilution            | 790-4462    | 37                            | 32                              |
| CK5/6      | Predilution            | 790-4554    | 37                            | 32                              |
| p40        | Predilution            | 790-4950    | 37                            | 32                              |
| Ki-67      | Predilution            | 790-4286    | 37                            | 32                              |

H&E, hematoxylin and eosin; ER, estrogen receptor; PR, progesterone receptor; HER2, human epidermal growth factor receptor 2; GATA3, guanine-adenine-thymine-adenine-binding protein 3; CK, cytokeratin; p53, tumor protein p53; Ki-67, proliferation index.
